# Supplementary material for: Antimicrobial potentiality of actinobacteria isolated from two microbiologically unexplored forest ecosystems of Northeast India
Source: PubMed Central journal article supplement (PMC6042205; doi:10.1186/s12866-018-1215-7), 2018-07-11
Supplement: 12866_2018_1215_MOESM2_ESM.pdf [file 12866_2018_1215_MOESM2_ESM.pdf]

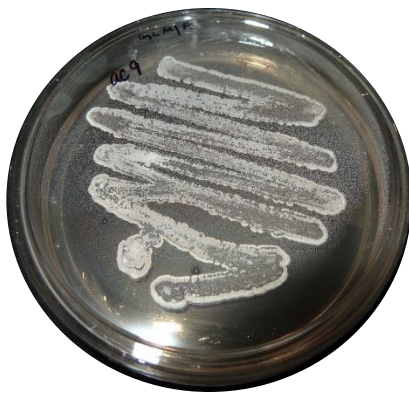

NNPR9

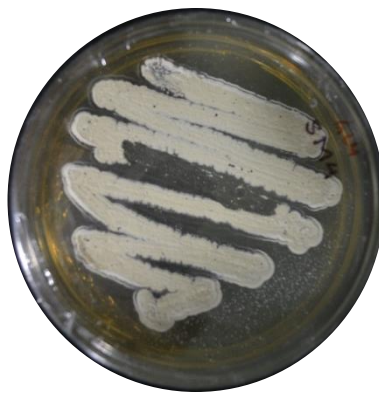

NNPR15

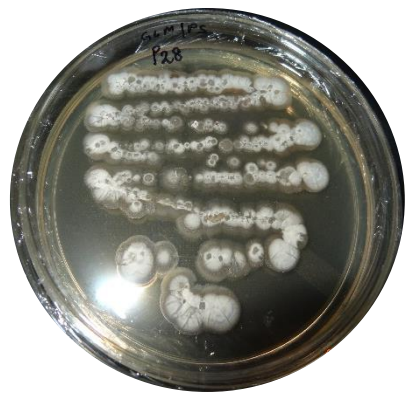

NNPR28

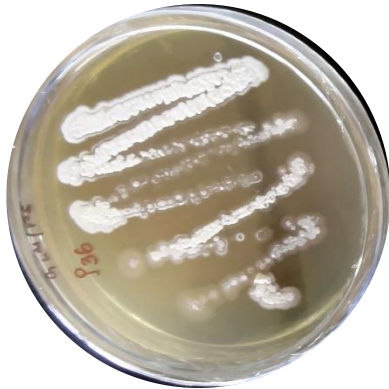

NNPR36

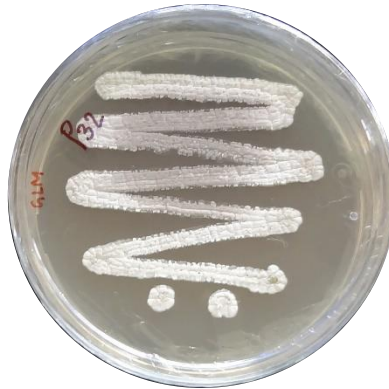

NNPR52

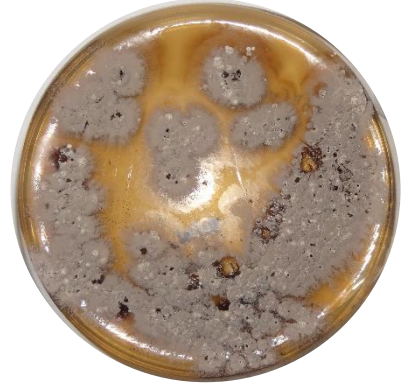

NNPR62

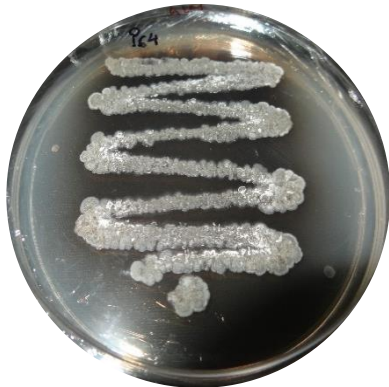

NNPR64

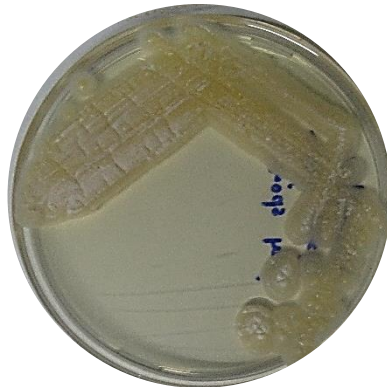

NNPR69

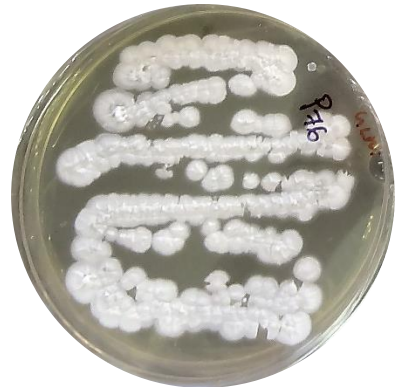

NNPR76

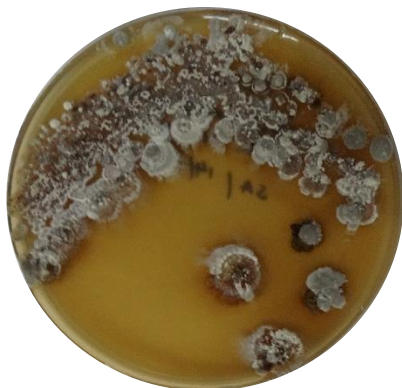

PWS6

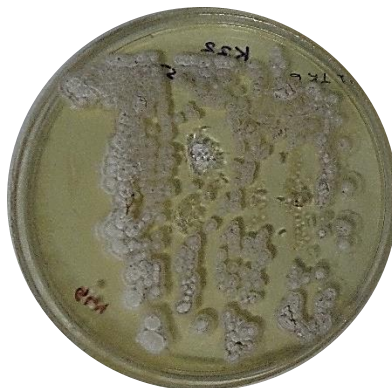

PWS22

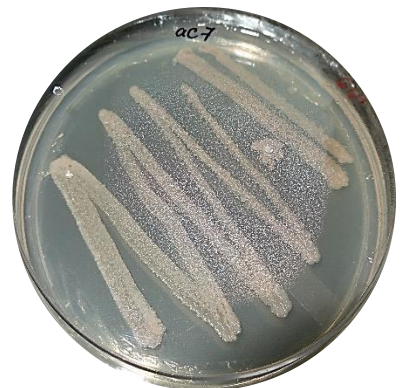

PWS38

Additional file 2: Figure S1 Colony morphological diversity of some of the 24 presumptive antimicrobial actinobacterial isolates.
