# Supplementary material for: Antimicrobial potentiality of actinobacteria isolated from two microbiologically unexplored forest ecosystems of Northeast India
Source: PubMed Central journal article supplement (PMC6042205; doi:10.1186/s12866-018-1215-7), 2018-07-11
Supplement: 12866_2018_1215_MOESM5_ESM.pdf [file 12866_2018_1215_MOESM5_ESM.pdf]

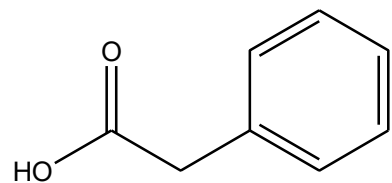

Benzeneacetic acid

**(1)**

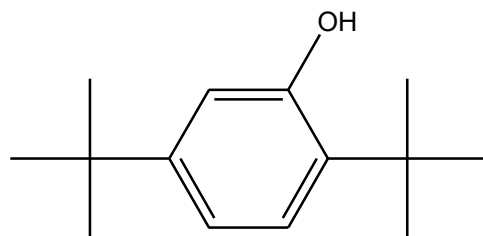

2,5-bis(1,1-dimethylethyl) Phenol

**(2)**

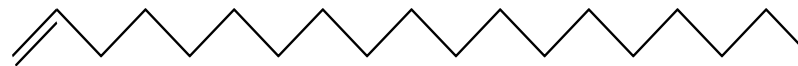

1-Nonadecene

**(3)**

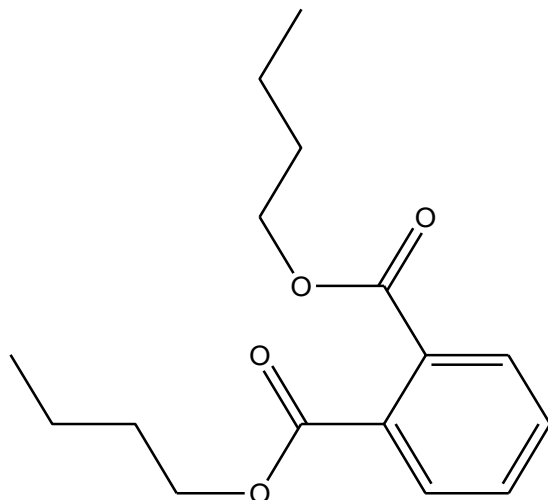

Dibutyl phthalate

**(4)**

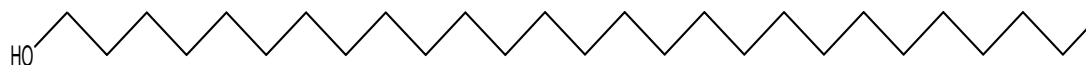

1- Heptacosanol

**(5)**

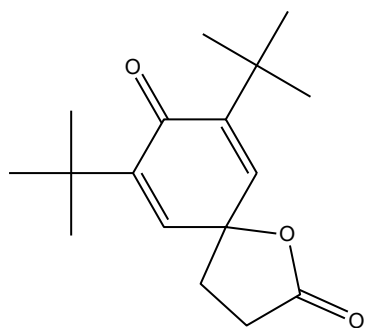

7,9-Di-tert-butyl-1-oxaspiro(4,5)deca-6,9-diene-2,8-dione

**(6)**

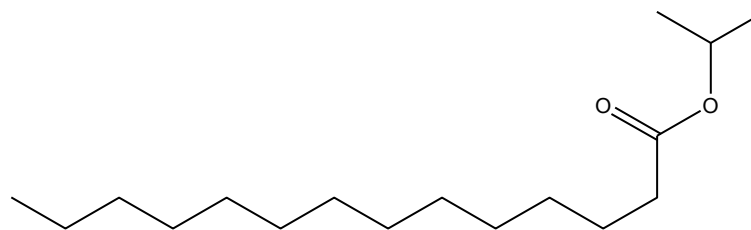

Isopropyl myristate

**(7)**

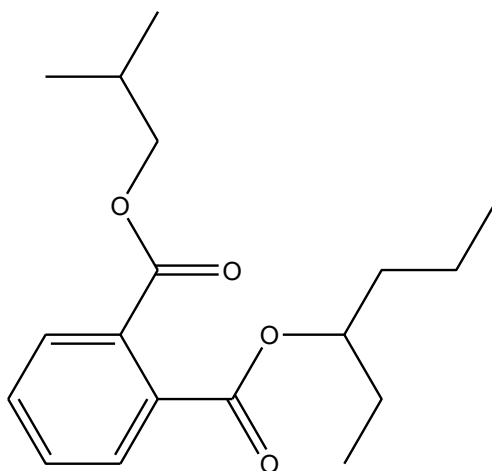

Phthalic acid, hex-3-yl isobutyl ester

**(8)**

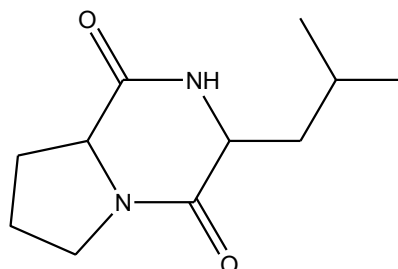

Pyrrolo[1,2-a]pyrazine-1,4-dione,  
hexahydro-3-(2-methylpropyl)

**(9)**

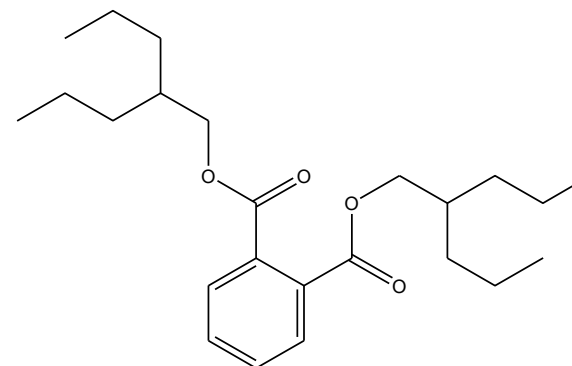

Phthalic acid, di(2-propylpentyl) ester

**(10)**

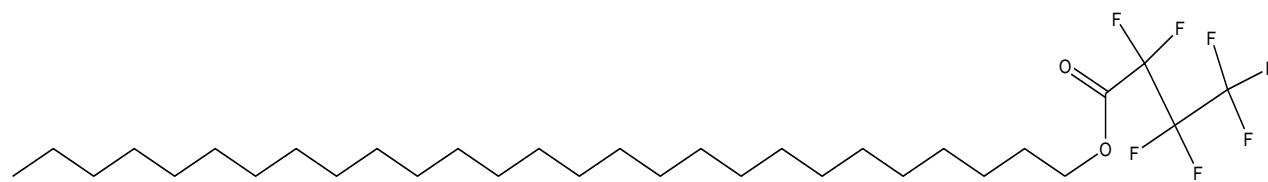

Heptacosyl heptafluorobutyrate

**(11)**

Additional file 5: Figure S3 Chemical structures of metabolites present in PWS52 extract analysed through GC-MS.
