# Supplementary material for: Antimicrobial potentiality of actinobacteria isolated from two microbiologically unexplored forest ecosystems of Northeast India
Source: PubMed Central journal article supplement (PMC6042205; doi:10.1186/s12866-018-1215-7), 2018-07-11
Supplement: 12866_2018_1215_MOESM6_ESM.pdf [file 12866_2018_1215_MOESM6_ESM.pdf]

T: FTMS + p ESI Full ms [150.00-2000.00]

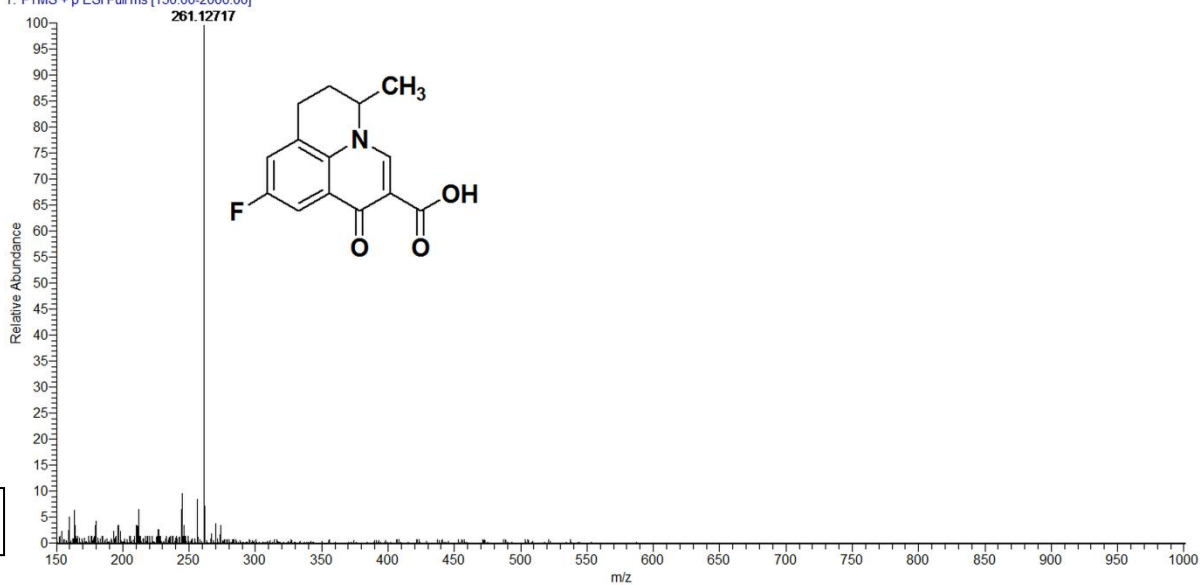

T: FTMS - p ESI Full ms [150.00-2000.00]

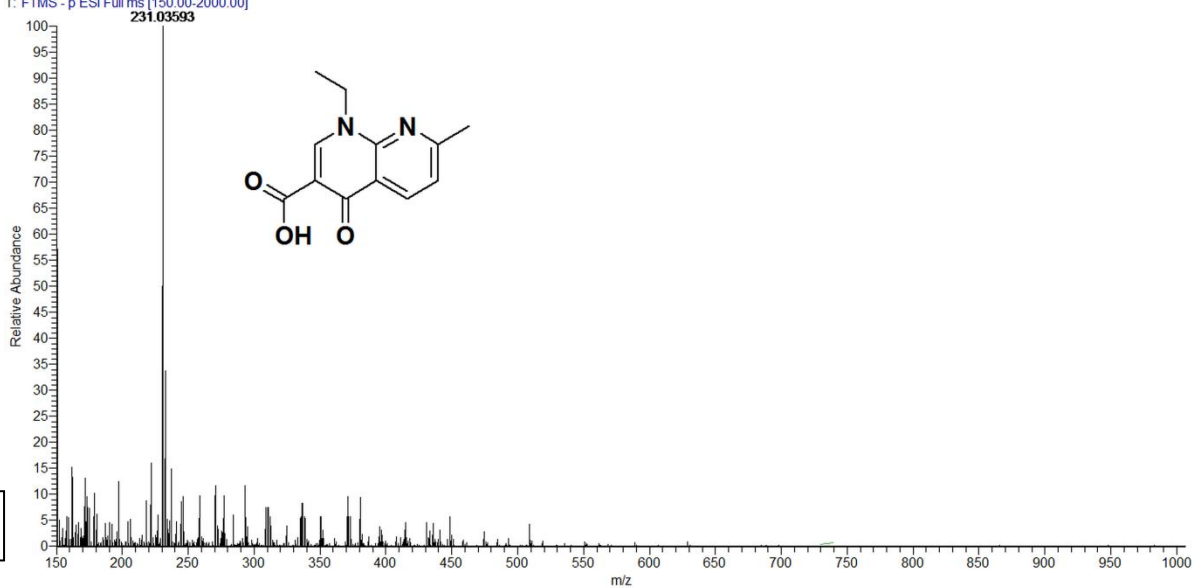

P77-STD2 #181 RT: 1.74 AV: 1 NL: 2.67E9  
T: FTMS + p ESI Full ms [150.00-2000.00]

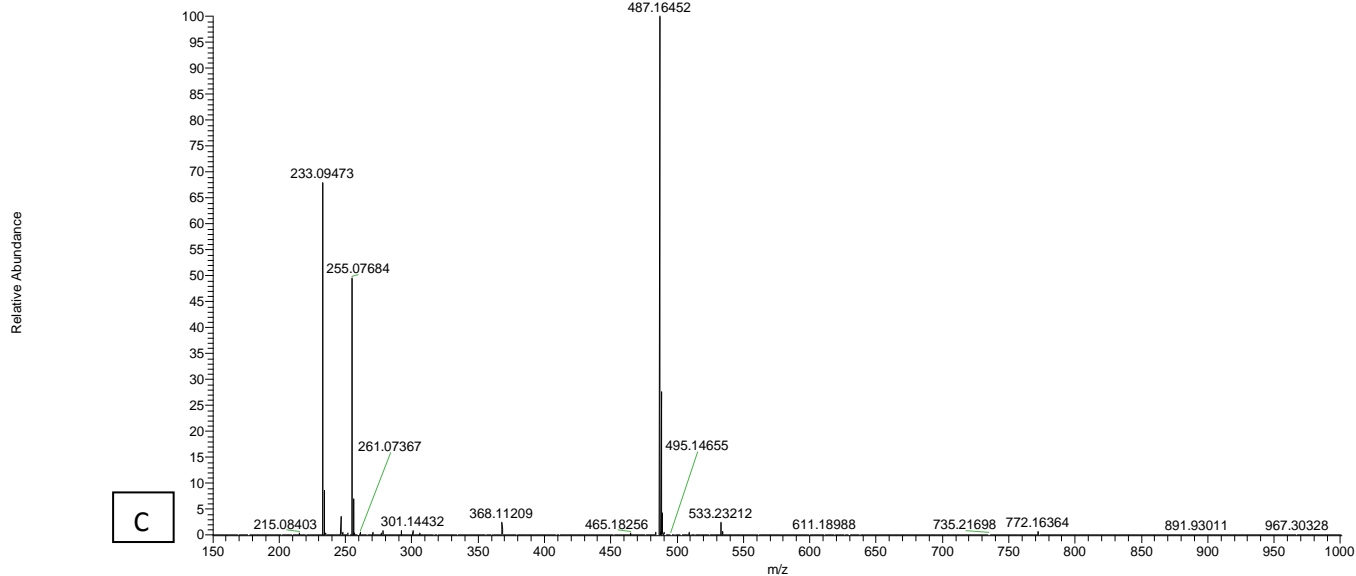

P77-STD2 #182 RT: 1.75 AV: 1 NL: 7.20E7  
T: FTMS - p ESI Full ms [150.00-2000.00]

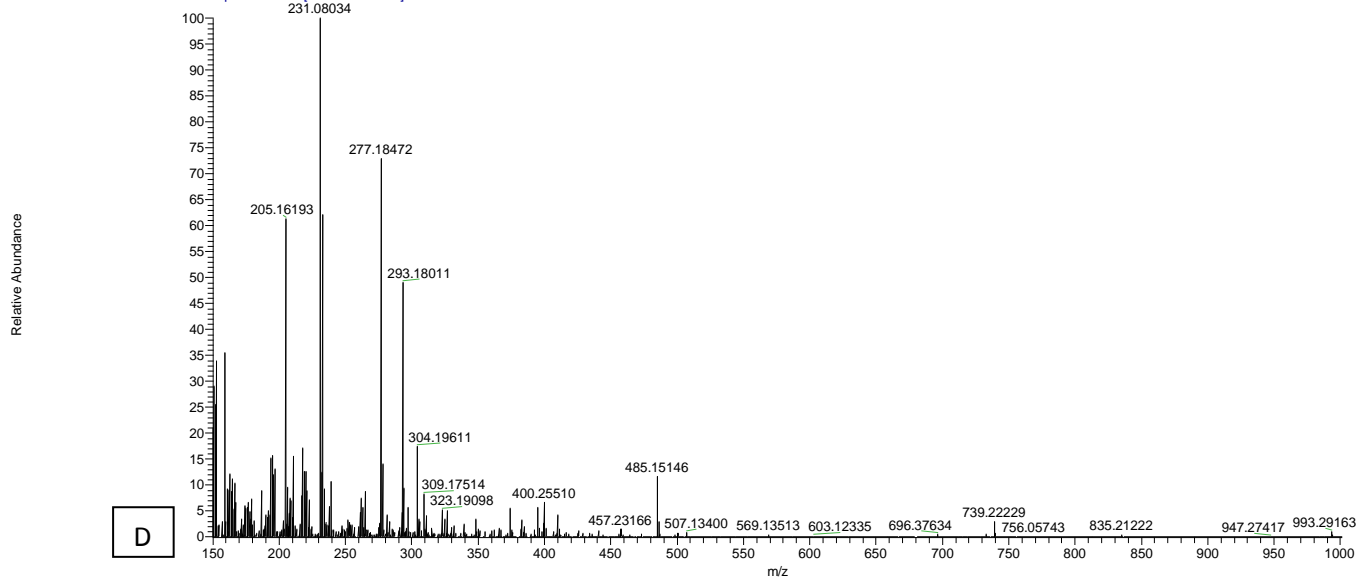

Additional file 6: Figure S4 Mass spectra of (A) nalidixic acid (B) flumequine present in PWS52 extract, (C) standard nalidixic acid (m/z : 233.09) in positive mode and (D) standard nalidixic acid (m/z: 231.08) in negative mode.
